# Supplementary material for: Analogous graphite carbon sheets derived from corn stalks as high performance sodium-ion battery anodes
Source: Royal Society of Chemistry journal article supplement (doi:10.1039/c6ra22769d), 2016-01-01
Supplement: c6ra22769d1.pdf [file c6ra22769d1.pdf]

## **Supplementary Information**

### **Analogous Graphite Carbon Sheets derived from Corn Stalks as High Performance Sodium-ion Batteries Anode**

**Decai Qin, Fang Zhang\*, Shengyang Dong, Yanzhang Zhao, Guiyin Xu, Xiaogang Zhang**

College of Materials Science and Technology, Jiangsu Key Laboratory of Materials and Technology for Energy Conversion, Nanjing University of Aeronautics and Astronautics, Nanjing, 210016, PR China

*E-mail: zhangfang@nuaa.edu.cn; Tel: +8613813972108.*

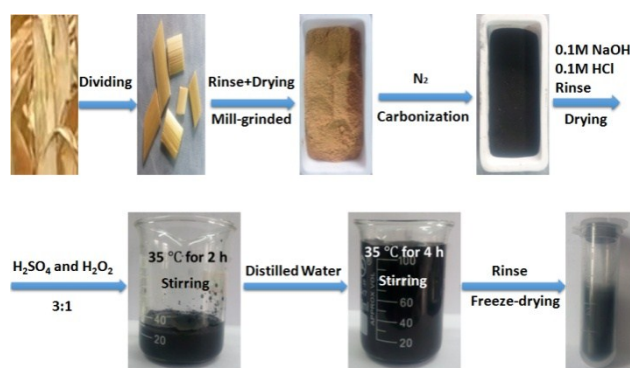

**Figure S1** Synthesis schematic of corn stalk derived carbon

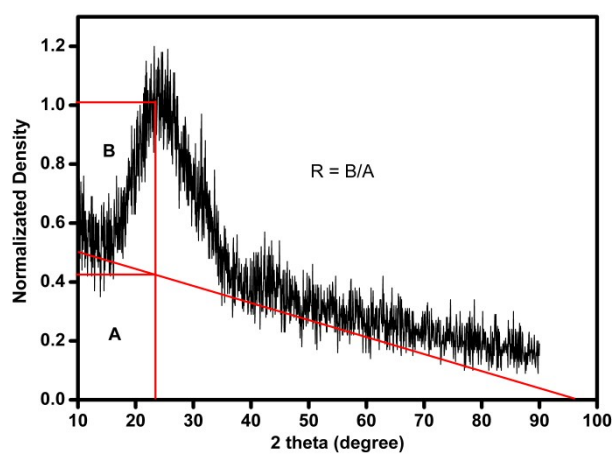

**Figure S2** An illustration for the definition of the ratio R-factor.
